# Supplementary material
Source: Elsevier journal article supplement (https://www.sciencedirect.com/science/article/pii/S0210570517302248)
Supplement: mmc1 [file S0210570517302248:mmc1.docx]

**SUPPLEMENTARY TABLE 1**

| **Variables** | **Gender** | **Route of infection** | **Immigrant status** | **HIV** | **IL28B** | **Geographical origin** | **Period of time** |
| --- | --- | --- | --- | --- | --- | --- | --- |
| **Age** | 73.241  P<0.001 | 50.608  P<0.001 | 2.047  0.153 | 8.206  P: 0.004 | 0.931  P: 0.628 | 27.944  P<0.001 | 58.458  P<0.001 |
| **Gender** |  | 102.395  P<0.001 | 0.051  P: 0.821 | 16.983  P<0.001 | 11.524  P: 0.003 | 11.257  P: 0.047 | 1.800  P: 0.407 |
| **Route of infection** |  |  | 32-165  P<0.001 | 154.753  P<0.001 | 3.240  p: 0.778 | 83.58  P<0.001 | 23.406  P: 0.001 |
| **Immigrant status** |  |  |  | 3.492  P: 0.062 | 1.915  P: 0.384 | 1,598.722  P<0.001 | 52.450  P<0.001 |
| **HIV** |  |  |  |  | 0.460  P: 0.795 | 10.003  P: 0.075 | 1-294  P: 0.524 |
| **IL28B** |  |  |  |  |  | 14.753  P: 0.141 | 2.128  P: 0.712 |
| **Geographical origin** |  |  |  |  |  |  | 49.219  P<0.001 |

**Contingency tables**
