# Supplementary material
Source: Elsevier journal article supplement (https://www.sciencedirect.com/science/article/pii/S0210570517302248)
Supplement: mmc2 [file S0210570517302248:mmc2.docx]

**SUPPLEMENTARY TABLE 2 REVISADO**

**Epidemiological characteristics of genotype 1a and genotype 4-infected patients**

|  | **Genotype 1a** | | | | | | | **Genotype 4** | | | | | | |
| --- | --- | --- | --- | --- | --- | --- | --- | --- | --- | --- | --- | --- | --- | --- |
|  | **Native** | | **Immigrants** | | **Total** | |  | **Native** | | **Immigrant** | | **Total** | |  |
| **Route of infection** | **n** | **%** | **n** | **%** | **n** | **%** | **p-value** | **n** | **%** | **n** | **%** | **n** | **%** | **p-value** |
| Sporadic | 28 | 16.7 | 1 | 12.5 | 29 | 16.5 |  | 13 | 12.0 | 1 | 14.3 | 14 | 12.2 |  |
| IDU | 89 | 53.0 | 5 | 62.5 | 94 | 53.4 |  | 71 | 65.7 | 2 | 28.5 | 73 | 63.5 |  |
| Transfusion-associated | 37 | 22.0 | 0 | 0 | 37 | 21.0 | 0.230* | 10 | 9.3 | 3 | 42.9 | 13 | 11.3 | 0.045* |
| Nosocomial/parenteral | 14 | 8.3 | 2 | 25.0 | 16 | 9.1 |  | 14 | 13.0 | 1 | 14.3 | 15 | 13.0 |  |
| Total | 168 | 95.4 | 8 | 4.6 | 176 | 100 |  | 108 | 100 | 7 | 100 | 115 | 100 |  |
|  |  | |  | |  | |  |  | |  | |  | |  |
| **Immigrants** | **HIV +ve** | | **HIV -ve** | | **Total** | |  | **HIV +ve** | | **HIV -ve** | | **Total** | |  |
|  | **n** | **%** | **n** | **%** | **n** | **%** |  | **n** | **%** | **n** | **%** | **n** | **%** |  |
| No | 46 | 88.5 | 189 | 95.0 | 235 | 93.6 |  | 34 | 97.1 | 135 | 91.2 | 169 | 92.3 |  |
| Yes | 6 | 11.5 | 10 | 5.0 | 16 | 6.4 | 0.089* | 1 | 3.9 | 13 | 8.8 | 14 | 7.7 | 0.236* |
| Total | 52 | 100 | 199 | 100 | 251 | 100 |  | 35 | 100 | 148 | 100 | 183 | 100 |  |
|  |  |  |  |  |  |  |  |  |  |  |  |  |  |  |
| **Immigrants’ geographical origin** |  |  |  |  |  |  |  |  |  |  |  |  |  |  |
| Western Europe | 2 | 33.3 | 2 | 20.0 | 4 | 25.0 |  | 0 | - | 3 | 21.4 | 3 | 20.0 |  |
| Africa | 0 | 0 | 1 | 10.0 | 1 | 6.2 |  | 0 | - | 4 | 28.6 | 4 | 26.7 |  |
| Eastern Europe | 0 | 0 | 1 | 100 | 1 | 6.2 |  | 0 | - | 0 | 0 | 0 | 0 |  |
| Latin America | 3 | 50.0 | 0 | 0 | 3 | 18.8 |  | 1 | - | 2 | 14.3 | 3 | 20.0 |  |
| Asia | 0 | 0 | 0 | 0 | 0 | 0 |  | 0 | - | 0 | 0 | 0 | 0 |  |
| Unknown | 1 | 17.7 | 6 | 60.0 | 7 | 43.8 |  | 0 | - | 5 | 35.7 | 5 | 33.3 |  |
| Total | 6 | 100 | 10 | 100 | 16 | 100 |  | 1 | - | 14 | 100 | 15 | 100 |  |

*Chi-square
